# Supplementary material
Source: bioRxiv or medRxiv preprint supplement (https://www.biorxiv.org/highwire/filestream/26344/field_highwire_adjunct_files/0/093492-1.pdf)

Supplemental Figure S1

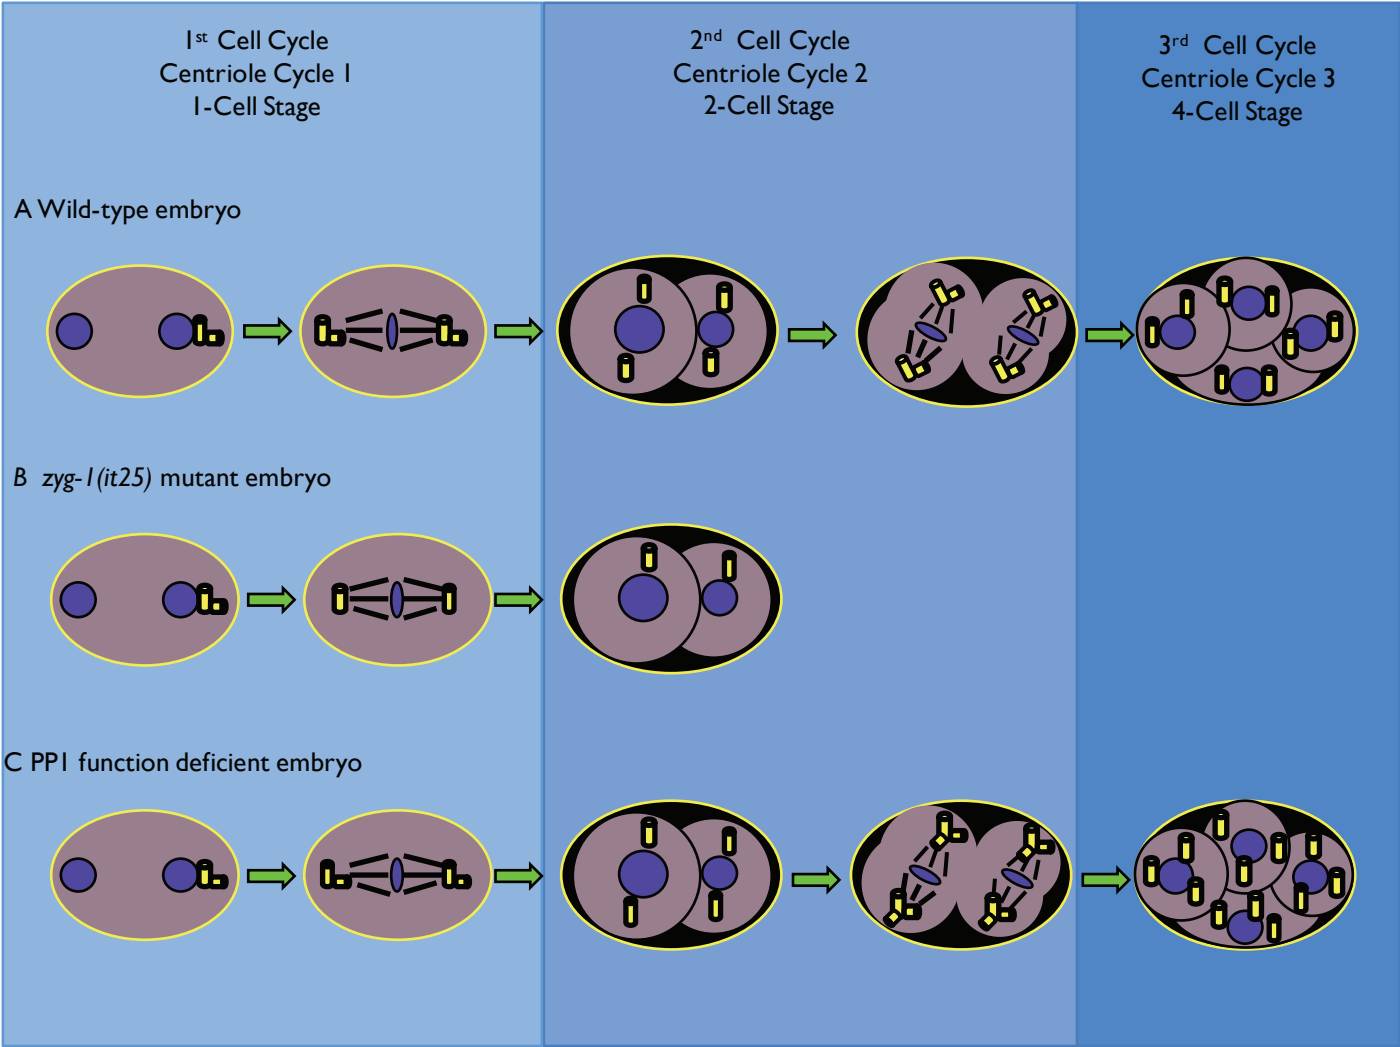

Supplemental Figure S2

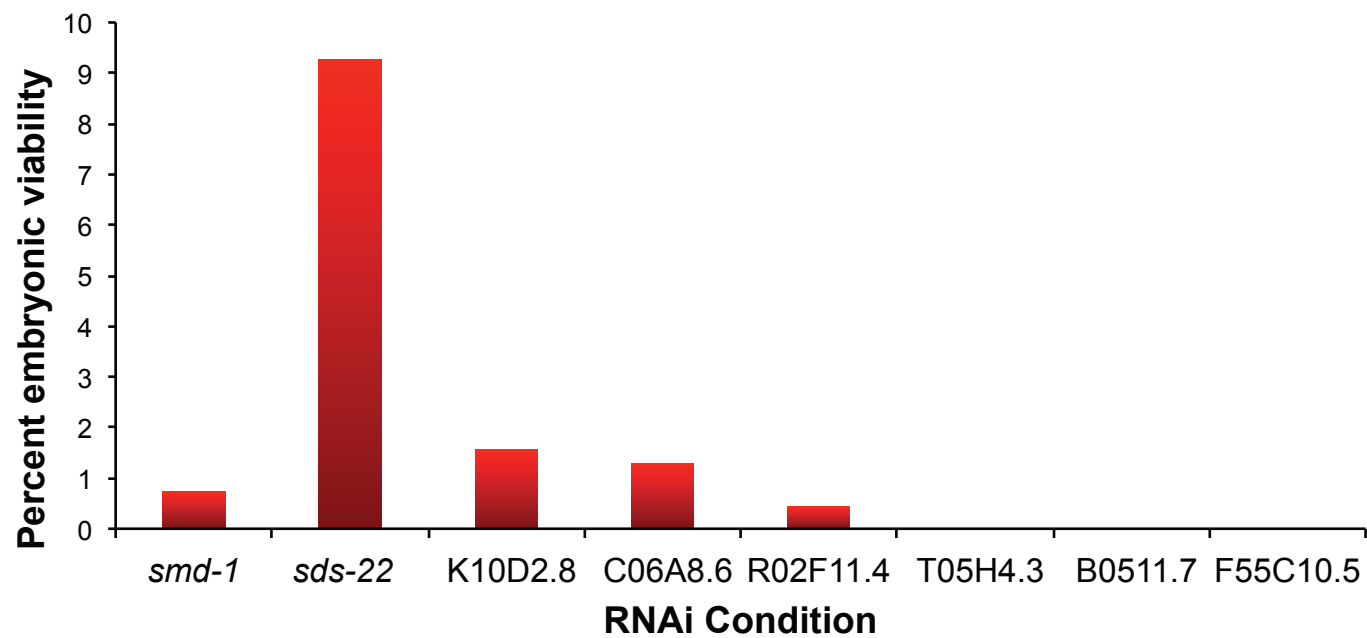

Supplemental Figure S3

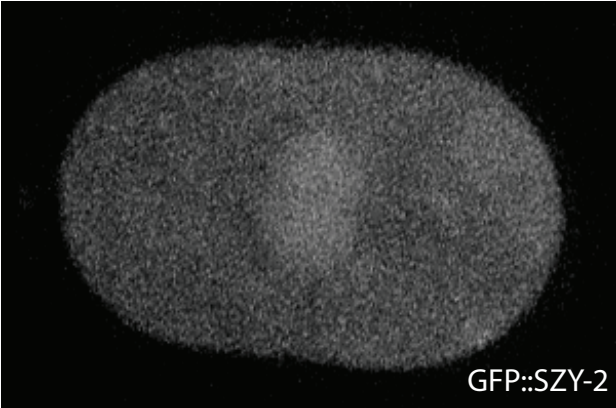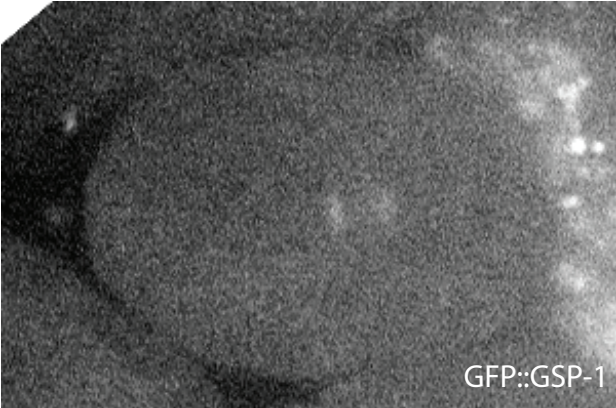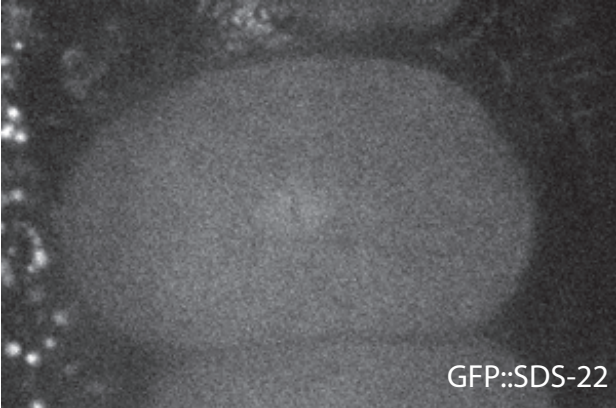

Supplemental Figure S4

PP1 $\beta$ <sup>GSP-1</sup> IP mass spec

| Gene Name          | Number of peptides | Rank             |
|--------------------|--------------------|------------------|
| <i>nmy-2</i>       | 67                 | 1 <sup>st</sup>  |
| <i>pab-1</i>       | 31                 | 2 <sup>nd</sup>  |
| <i>atx-2</i>       | 26                 | 3 <sup>rd</sup>  |
| <i>ani-1</i>       | 24                 | 4 <sup>th</sup>  |
| <i>tcc-1</i>       | 21                 | 5 <sup>th</sup>  |
| <i>sds-22</i>      | 18                 | 10 <sup>th</sup> |
| <i>gsp-1</i>       | 16                 | 14 <sup>th</sup> |
| <i>szy-2 (l-2)</i> | 10                 | 50 <sup>th</sup> |

I-2<sup>SZY-2</sup> IP mass spec

| Gene Name          | Number of peptides | Rank            |
|--------------------|--------------------|-----------------|
| <i>gsp-2</i>       | 17                 | 1 <sup>st</sup> |
| <i>tbb-2</i>       | 11                 | 2 <sup>nd</sup> |
| <i>gsp-1</i>       | 9                  | 3 <sup>rd</sup> |
| <i>hsp-1</i>       | 7                  | 4 <sup>th</sup> |
| <i>pab-1</i>       | 7                  | 5 <sup>th</sup> |
| <i>szy-2 (l-2)</i> | 6                  | 8 <sup>th</sup> |

SDS-22 IP mass spec

| Gene Name      | Number of peptides | Rank             |
|----------------|--------------------|------------------|
| <i>tsn-1</i>   | 13                 | 1 <sup>st</sup>  |
| <i>tbb-2</i>   | 12                 | 2 <sup>nd</sup>  |
| <i>hsp-60</i>  | 9                  | 3 <sup>rd</sup>  |
| <i>C08H9.2</i> | 9                  | 4 <sup>th</sup>  |
| <i>tcp-1</i>   | 8                  | 5 <sup>th</sup>  |
| <i>sds-22</i>  | 8                  | 7 <sup>th</sup>  |
| <i>gsp-2</i>   | 6                  | 16 <sup>th</sup> |
| <i>gsp-1</i>   | 1                  | 91 <sup>st</sup> |

Supplemental Figure S5

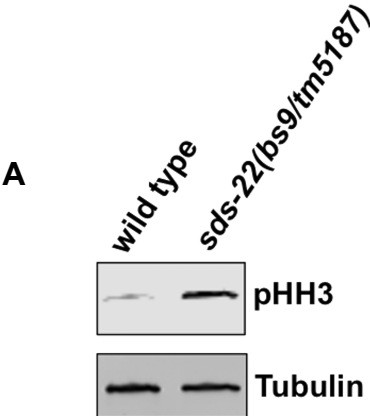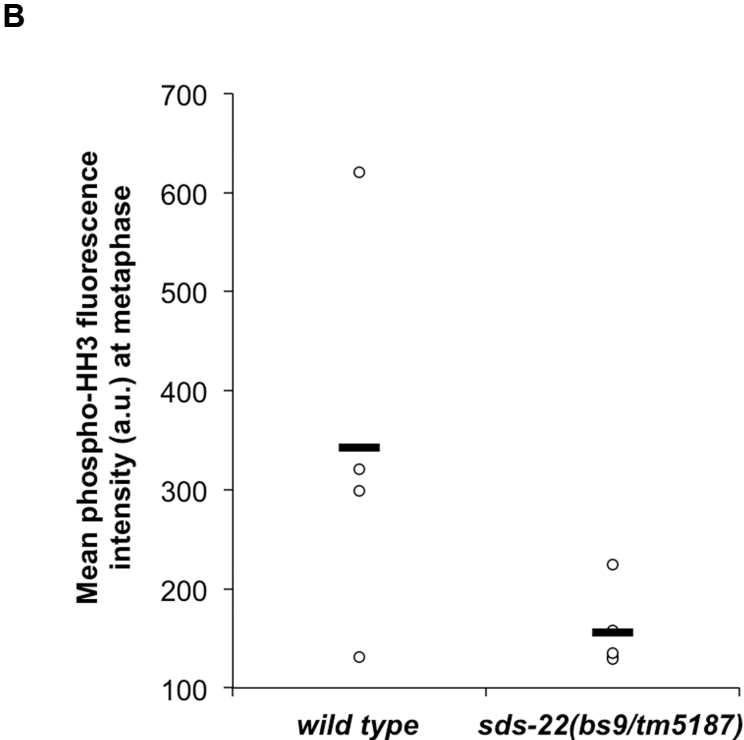

Supplementary Figure S6

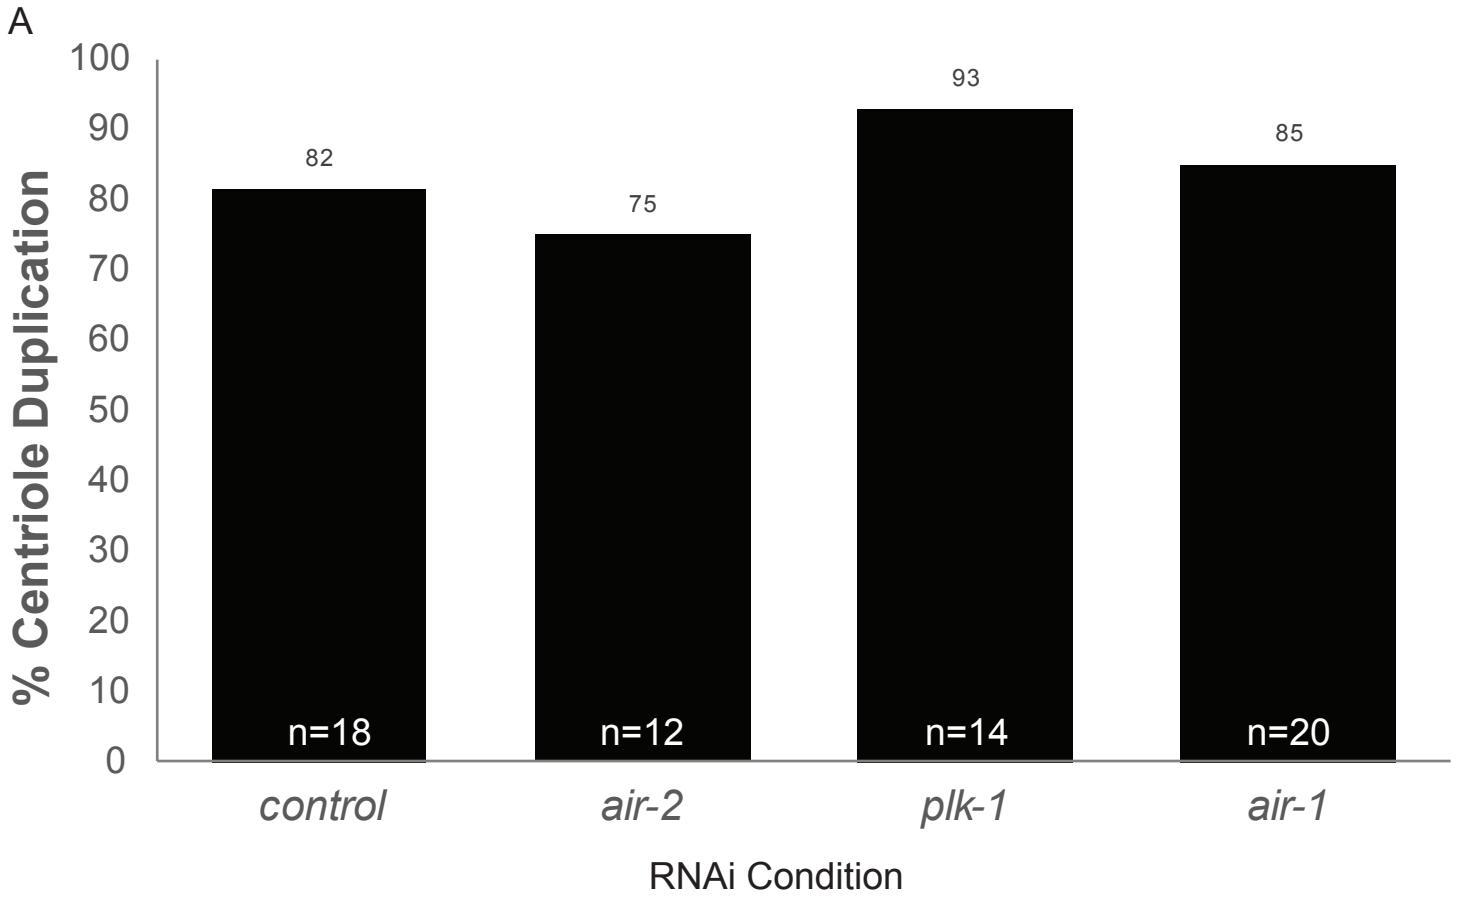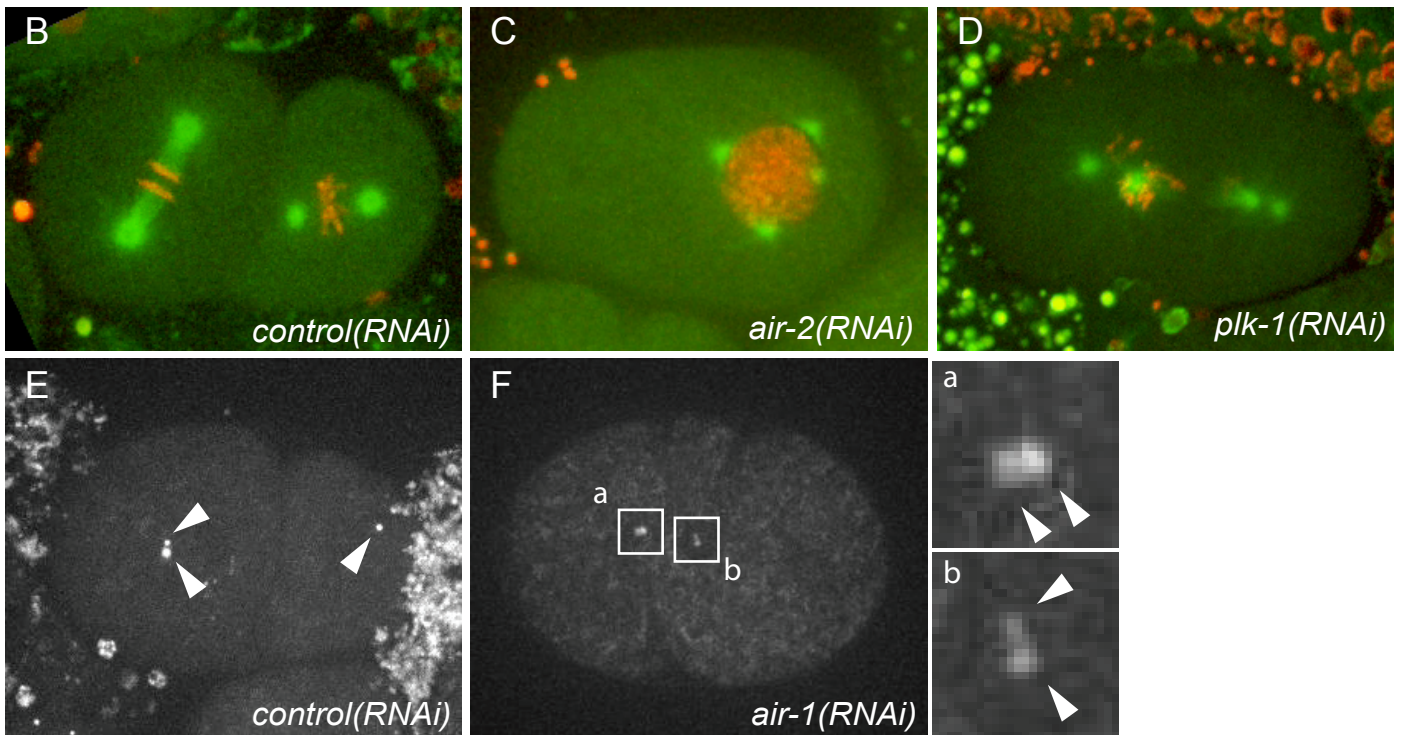

# Supplemental Figure S7

A

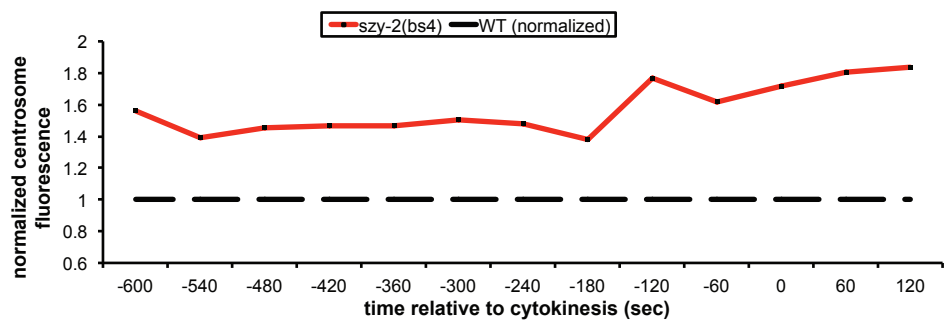

B

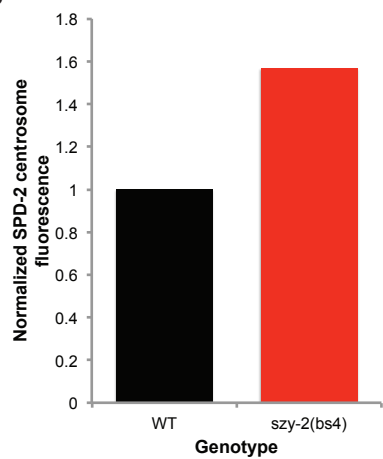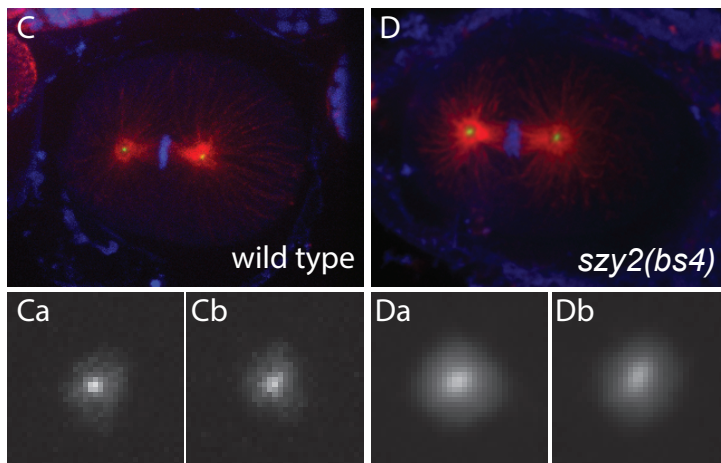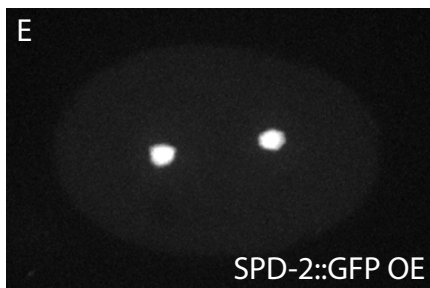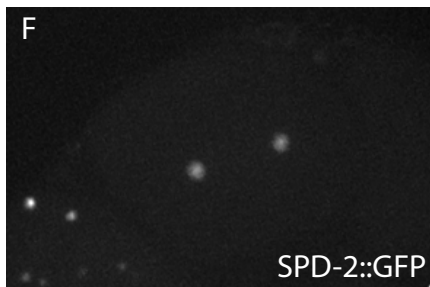

G

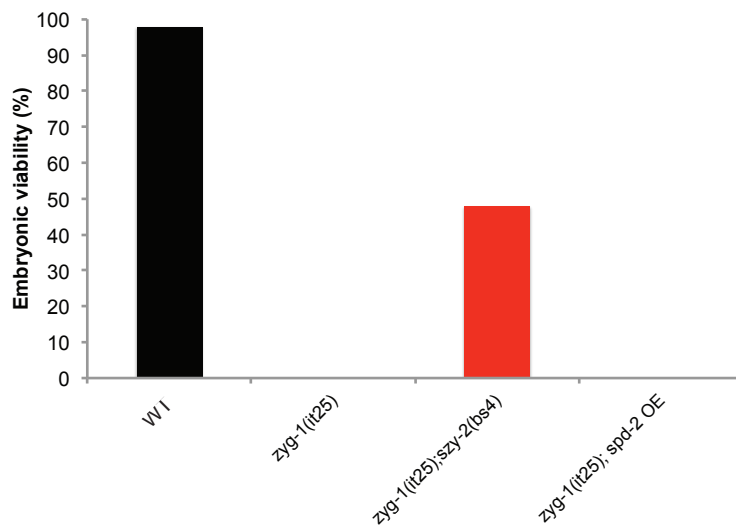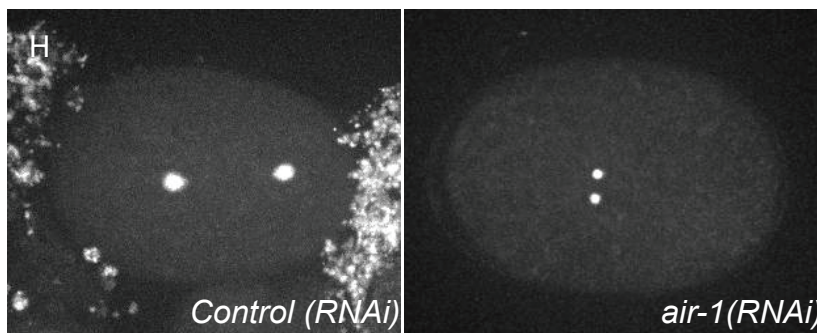

Supplemental Figure S8

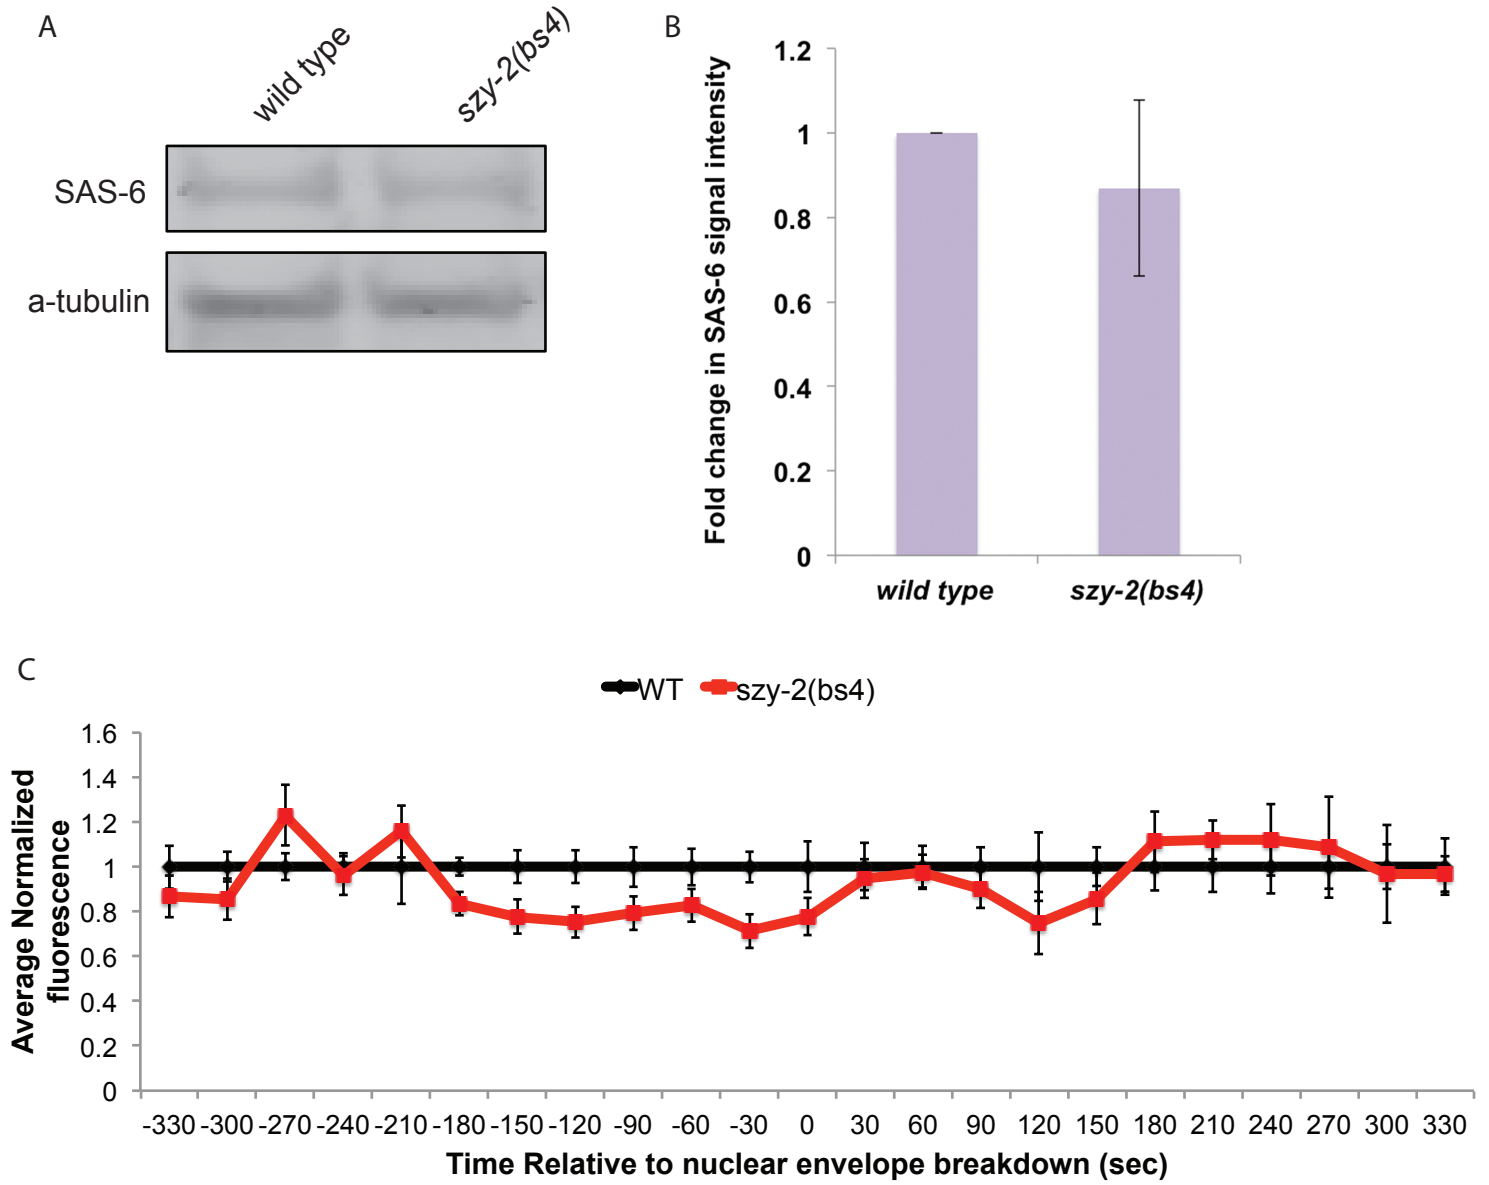



Supplemental Figure S9

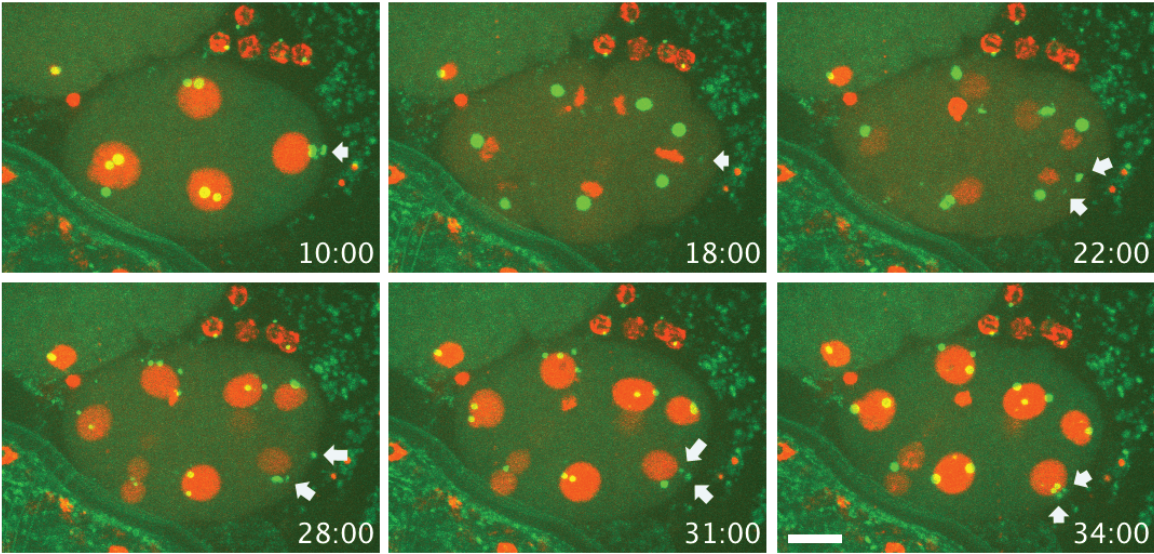

Supplement: Supplementary file [file 093492-1.pdf]
